# Supplementary material for: Rational design of porous CexNb1−x oxide hollow nanospheres as a novel NH3-SCR catalyst
Source: Royal Society of Chemistry journal article supplement (doi:10.1039/d2ta02845j), 2022-01-01
Supplement: d2ta02845j1.pdf [file d2ta02845j1.pdf]

## **Supporting Information**

### **Rational design of porous $\text{Ce}_x\text{Nb}_{1-x}$ oxide hollow nanosphere as novel $\text{NH}_3$ -SCR catalyst**

Hongjian Zhu and Rui Wang\*

School of Environmental Science and Engineering, Shandong University, No. 72

Seaside Road, Qingdao 266237, China

**\*Corresponding Author. E-mail:** wangrui@sdu.edu.cn.

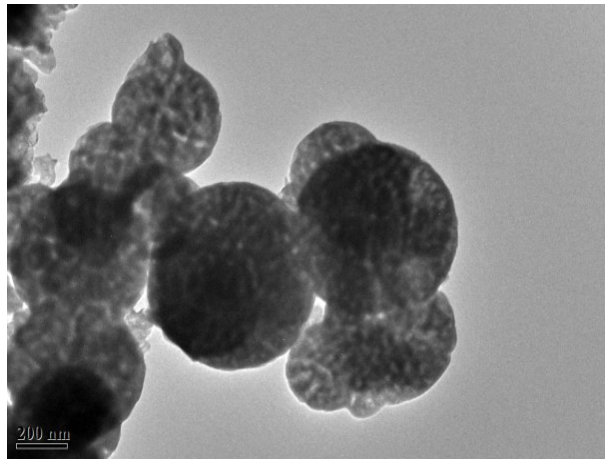

Fig. S1. TEM image of Nb<sub>2</sub>O<sub>5</sub>.

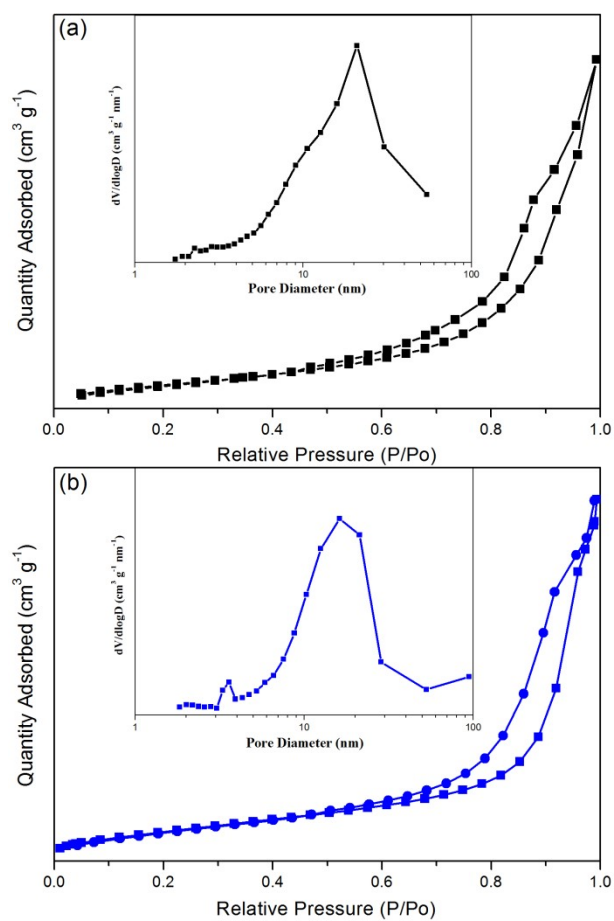

Fig. S2.  $N_2$  sorption isotherms and pore size distributions (inset) of the obtained (a)  $Ce_{0.4}Nb_{0.6}$  and (b)  $Nb_2O_5$  catalysts.
